# Supplementary material for: Association of Weight Loss Between Early Adulthood and Midlife With All-Cause Mortality Risk in the US
Source: PubMed Central journal article supplement — JAMA Netw Open. 2020 Aug 14;3(8):e2013448. doi: 10.1001/jamanetworkopen.2020.13448 (PMC7428805; doi:10.1001/jamanetworkopen.2020.13448), 2020-08-14
Supplement: jamanetwopen-3-e2013448-s001.pdf [file jamanetwopen-3-e2013448-s001.pdf]

## Supplementary Online Content

Xie, W, Lundberg DJ, Collins JM, et al. Association of weight loss between early adulthood and midlife with all-cause mortality risk in the US. *JAMA Netw Open*. 2020;3(8):e2013448. doi:10.1001/jamanetworkopen.2020.13448

**eTable 1.** Weight Change Categories from Young Adulthood to Midlife

**eTable 2.** Adjusted Hazard Ratios of All-cause Mortality for Weight Change Patterns from Midlife to Late Adulthood

**eTable 3.** Adjusted Hazard Ratios of All-cause Mortality for Risk Reduction and Residual Risk Hypotheses, Assessing Weight Change from Midlife to Late Adulthood

**eFigure 1.** Study Inclusion/Exclusion Criteria for Analytic Sample, NHANES 1988-1994 & 1999-2016

**eFigure 2.** Adjusted Cumulative Hazard Curves of All-cause Mortality for Selected Weight Change Patterns from Young Adulthood to Midlife

**eFigure 3.** Adjusted Hazard Ratios of All-cause Mortality for Weight Change Patterns across Adulthood by Baseline Age and Sex

This supplementary material has been provided by the authors to give readers additional information about their work.

**eTable 1.** Weight Change Categories from Young Adulthood to Midlife

| <b>Category</b>           | <b>Patterns</b>       | <b>BMI at age 25<br/>(Young adulthood)</b> | <b>BMI at 10 years before baseline<br/>(Midlife)</b> |
|---------------------------|-----------------------|--------------------------------------------|------------------------------------------------------|
| <b>Weight maintenance</b> | Normal-normal         | 18.5-24.9 kg/m <sup>2</sup>                | 18.5-24.9 kg/m <sup>2</sup>                          |
|                           | Overweight-overweight | 25.0-29.9 kg/m <sup>2</sup>                | 25.0-29.9 kg/m <sup>2</sup>                          |
|                           | Obese-obese           | ≥ 30.0 kg/m <sup>2</sup>                   | ≥ 30.0 kg/m <sup>2</sup>                             |
| <b>Weight gain</b>        | Normal-overweight     | 18.5-24.9 kg/m <sup>2</sup>                | 25.0-29.9 kg/m <sup>2</sup>                          |
|                           | Normal-obese          | 18.5-24.9 kg/m <sup>2</sup>                | ≥ 30.0 kg/m <sup>2</sup>                             |
|                           | Overweight-obese      | 25.0-29.9 kg/m <sup>2</sup>                | ≥ 30.0 kg/m <sup>2</sup>                             |
| <b>Weight loss</b>        | Overweight-normal     | 25.0-29.9 kg/m <sup>2</sup>                | 18.5-24.9 kg/m <sup>2</sup>                          |
|                           | Obese-Normal          | ≥ 30.0 kg/m <sup>2</sup>                   | 18.5-24.9 kg/m <sup>2</sup>                          |
|                           | Obese-overweight      | ≥ 30.0 kg/m <sup>2</sup>                   | 25.0-29.9 kg/m <sup>2</sup>                          |

**eTable 2.** Adjusted Hazard Ratios of All-cause Mortality for Weight Change Patterns from Midlife to Late Adulthood

|                                                                                                                                                                                                                                                                                                                                               | Weight Change Patterns |                         |                     |                     |                     |                     |                     |                     |                     |
|-----------------------------------------------------------------------------------------------------------------------------------------------------------------------------------------------------------------------------------------------------------------------------------------------------------------------------------------------|------------------------|-------------------------|---------------------|---------------------|---------------------|---------------------|---------------------|---------------------|---------------------|
|                                                                                                                                                                                                                                                                                                                                               | Weight Maintenance     |                         |                     | Weight Gain         |                     |                     | Weight Loss         |                     |                     |
|                                                                                                                                                                                                                                                                                                                                               | Normal - normal        | Overweight - overweight | Obese – obese       | Normal - overweight | Normal - obese      | Overweight - obese  | Overweight - normal | Obese - Normal      | Obese - overweight  |
| <i>Full sample</i>                                                                                                                                                                                                                                                                                                                            |                        |                         |                     |                     |                     |                     |                     |                     |                     |
| No. of events                                                                                                                                                                                                                                                                                                                                 | 1083                   | 1079                    | 1060                | 595                 | 163                 | 666                 | 389                 | 84                  | 361                 |
| Events/1000 py                                                                                                                                                                                                                                                                                                                                | 18.2                   | 19.9                    | 22.3                | 14.8                | 15.3                | 16.8                | 36.0                | 50.4                | 32.2                |
| Age-adjusted HR <sup>‡</sup> (95% CI)                                                                                                                                                                                                                                                                                                         | 1<br>[Reference]       | 1.02<br>(0.91-1.15)     | 1.51<br>(1.34-1.69) | 0.95<br>(0.83-1.08) | 1.54<br>(1.26-1.88) | 1.18<br>(1.06-1.32) | 1.73<br>(1.43-2.09) | 2.87<br>(1.94-4.25) | 1.77<br>(1.44-2.17) |
| Multivariable adjusted HR (95% CI) <sup>†</sup>                                                                                                                                                                                                                                                                                               | 1<br>[Reference]       | 0.96<br>(0.85-1.09)     | 1.54<br>(1.37-1.73) | 0.97<br>(0.85-1.11) | 1.52<br>(1.24-1.87) | 1.20<br>(1.06-1.35) | 1.44<br>(1.19-1.75) | 2.04<br>(1.33-3.15) | 1.58<br>(1.30-1.92) |
| <i>Never smokers</i>                                                                                                                                                                                                                                                                                                                          |                        |                         |                     |                     |                     |                     |                     |                     |                     |
| No. of events                                                                                                                                                                                                                                                                                                                                 | 299                    | 369                     | 425                 | 174                 | 54                  | 243                 | 113                 | 16                  | 142                 |
| Events/1000 py                                                                                                                                                                                                                                                                                                                                | 11.1                   | 14.6                    | 16.9                | 8.9                 | 11.6                | 11.9                | 28.1                | 34.2                | 29.8                |
| Age-adjusted HR <sup>‡</sup> (95% CI)                                                                                                                                                                                                                                                                                                         | 1<br>[Reference]       | 1.21<br>(0.98-1.51)     | 1.87<br>(1.58-2.21) | 1.01<br>(0.77-1.33) | 1.75<br>(1.15-2.67) | 1.27<br>(1.02-1.56) | 1.87<br>(1.39-2.51) | 3.94<br>(1.70-3.54) | 2.45<br>(1.70-3.54) |
| Multivariable adjusted HR (95% CI) <sup>†</sup>                                                                                                                                                                                                                                                                                               | 1<br>[Reference]       | 1.09<br>(0.87-1.36)     | 1.66<br>(1.38-1.98) | 0.96<br>(0.72-1.27) | 1.60<br>(1.04-2.46) | 1.15<br>(0.93-1.42) | 1.68<br>(1.24-2.27) | 3.09<br>(1.65-5.79) | 2.06<br>(1.41-3.01) |
| Abbreviations: HR, hazard ratio; CI, confidence interval                                                                                                                                                                                                                                                                                      |                        |                         |                     |                     |                     |                     |                     |                     |                     |
| <sup>‡</sup> Age at baseline (continuous).                                                                                                                                                                                                                                                                                                    |                        |                         |                     |                     |                     |                     |                     |                     |                     |
| <sup>†</sup> Adjusted for age at baseline (years); sex (male, female); race (non-Hispanic white, non-Hispanic black, Hispanic, and other), education (less than high school, high school or equivalent, college and above), nativity (U.S.-born, and non-U.S.-born), smoking status (never, former and current) and survey year (continuous). |                        |                         |                     |                     |                     |                     |                     |                     |                     |

| <b>eTable 3.</b> Adjusted Hazard Ratios of All-cause Mortality for Risk Reduction and Residual Risk Hypotheses, Assessing Weight Change from Midlife to Late Adulthood |                                                |                 |        |      |                 |        |      |
|------------------------------------------------------------------------------------------------------------------------------------------------------------------------|------------------------------------------------|-----------------|--------|------|-----------------|--------|------|
|                                                                                                                                                                        |                                                | Full sample     |        |      | Never smokers   |        |      |
|                                                                                                                                                                        |                                                | HR <sup>†</sup> | 95% CI |      | HR <sup>†</sup> | 95% CI |      |
|                                                                                                                                                                        | <i>Risk reduction</i>                          |                 |        |      |                 |        |      |
|                                                                                                                                                                        | Obese-overweight (ref: obese-obese)            | 1.02            | 0.85   | 1.23 | 1.25            | 0.87   | 1.79 |
|                                                                                                                                                                        | Overweight-normal (ref: overweight-overweight) | 1.50            | 1.26   | 1.78 | 1.54            | 1.17   | 2.03 |
|                                                                                                                                                                        | <i>Residual risk</i>                           |                 |        |      |                 |        |      |
|                                                                                                                                                                        | Obese-overweight (ref: overweight-overweight)  | 1.64            | 1.38   | 1.95 | 1.89            | 1.35   | 2.66 |
|                                                                                                                                                                        | Overweight-normal (ref: normal-normal)         | 1.44            | 1.19   | 1.75 | 1.68            | 1.24   | 2.27 |

Abbreviations: HR, hazard ratio; CI, confidence interval; ref, reference

<sup>†</sup> Adjusted for age at baseline (years); sex (male, female); race (non-Hispanic white, non-Hispanic black, Hispanic, and other), education (less than high school, high school or equivalent, college and above), nativity (U.S.-born, and non-U.S.-born), smoking status (never, former and current) and survey year (continuous).

**eFigure 1.** Study Inclusion/Exclusion Criteria for Analytic Sample, NHANES 1988-1994 & 1999-2016

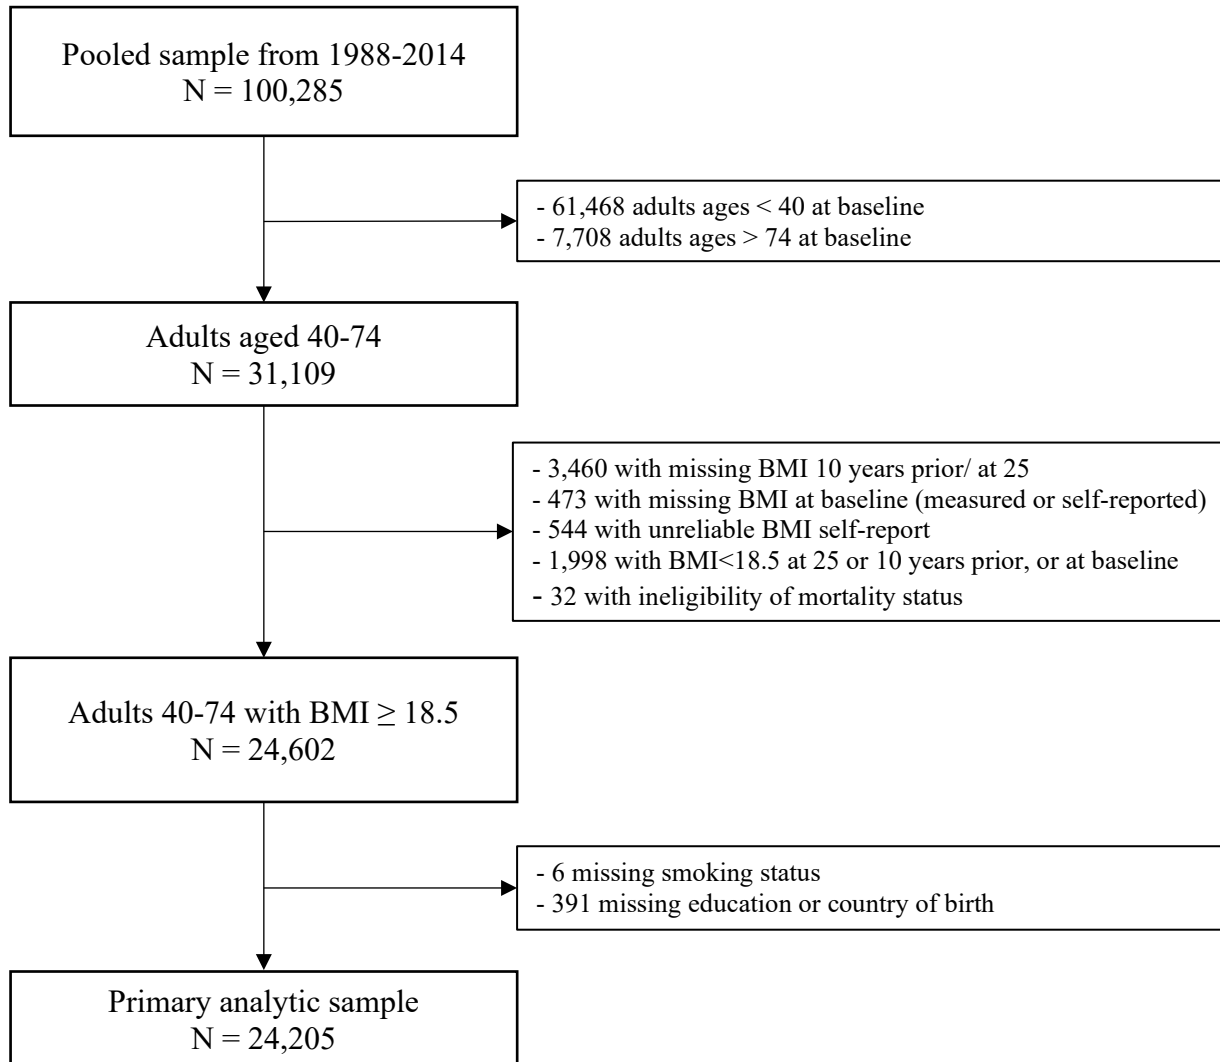

**eFigure 2.** Adjusted Cumulative Hazard Curves of All-cause Mortality for Selected Weight Change Patterns from Young Adulthood to Midlife

**A. Full sample**

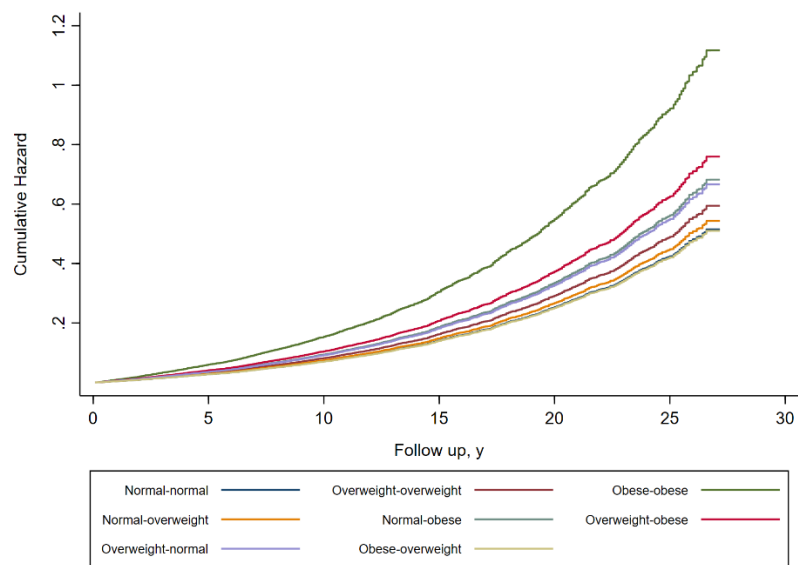

| No. at risk           |      |      |      |      |      |     |  |
|-----------------------|------|------|------|------|------|-----|--|
| Normal-normal         | 8622 | 6694 | 4484 | 2519 | 1723 | 551 |  |
| Overweight-overweight | 2836 | 2142 | 1328 | 701  | 426  | 148 |  |
| Obese-obese           | 1415 | 962  | 535  | 267  | 154  | 34  |  |
| Normal-overweight     | 6379 | 4890 | 3068 | 1598 | 980  | 269 |  |
| Normal-obese          | 2295 | 1633 | 893  | 402  | 229  | 62  |  |
| Overweight-obese      | 2404 | 1728 | 957  | 460  | 272  | 77  |  |
| Overweight-normal     | 363  | 275  | 187  | 104  | 67   | 21  |  |
| Obese-overweight      | 215  | 168  | 99   | 44   | 26   | 4   |  |

## B. Never smokers

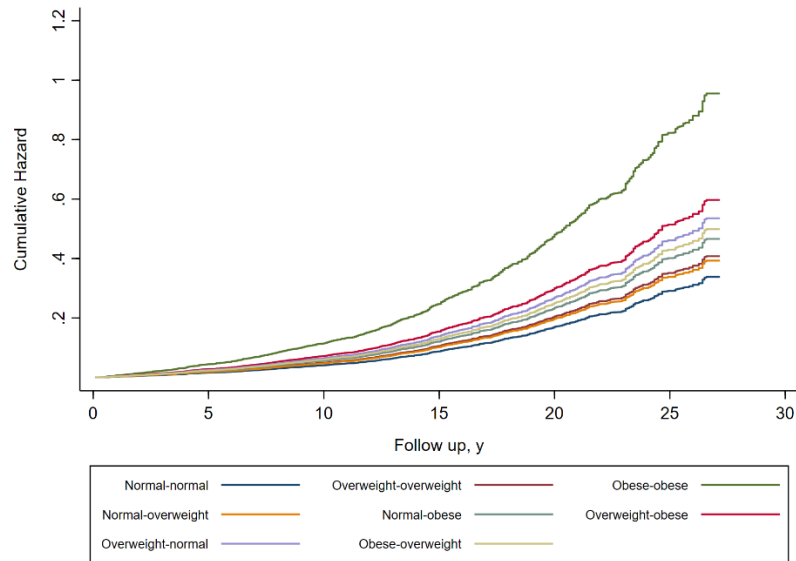

| No. at risk |                       |      |      |      |      |     |     |
|-------------|-----------------------|------|------|------|------|-----|-----|
|             | Normal-normal         | 4023 | 3102 | 2049 | 1173 | 801 | 233 |
|             | Overweight-overweight | 1277 | 951  | 570  | 293  | 173 | 55  |
|             | Obese-obese           | 735  | 495  | 274  | 130  | 68  | 15  |
|             | Normal-overweight     | 3146 | 2384 | 1484 | 777  | 476 | 124 |
|             | Normal-obese          | 1181 | 854  | 482  | 224  | 127 | 35  |
|             | Overweight-obese      | 1159 | 839  | 465  | 218  | 125 | 31  |
|             | Overweight-normal     | 139  | 109  | 70   | 39   | 26  | 7   |
|             | Obese-overweight      | 82   | 67   | 41   | 22   | 12  | 2   |

Notes: Curves were adjusted for age at baseline (years); sex (male, female); race (non-Hispanic white, non-Hispanic black, Hispanic, and other), education (less than high school, high school or equivalent, college and above), nativity (U.S.-born, and non-U.S.-born), smoking status (never, former and current) and survey year (continuous).

**eFigure 3.** Adjusted Hazard Ratios of All-cause Mortality for Weight Change Patterns across Adulthood by Baseline Age and Sex

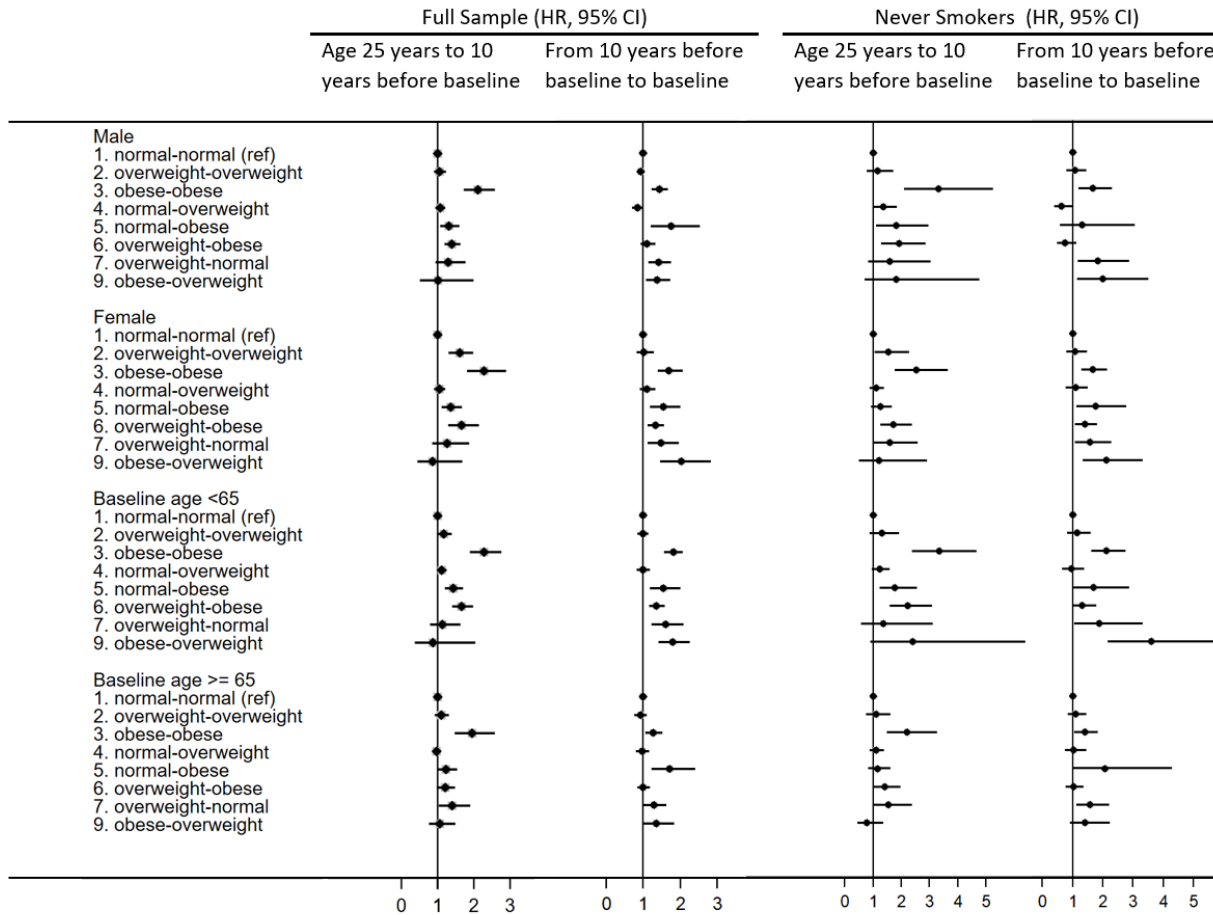

Notes: estimated HRs were adjusted for age at survey (years); sex (male, female); race (non-Hispanic white, non-Hispanic black, Hispanic, and other), education (less than high school, high school or equivalent, college and above), nativity (U.S.-born, and non-U.S.-born), smoking status (never, former and current) and survey year (continuous).
